# Supplementary material for: Women’s Empowerment and Associated Factors in Kinshasa, Democratic Republic of Congo: a Secondary Data Analysis of the Performance Monitoring Assessment (PMA) survey
Source: Preprints.org preprint supplement (doi:10.20944/preprints202405.1978.v1), 2024-05-29
Supplement: Supplementary file 1 [file supplementary]

**Table A1. Transformation and recoding of empowerment items**

| **Household Decision-Making** | | | | | | | | |
| --- | --- | --- | --- | --- | --- | --- | --- | --- |
| **item** | **Questions** | | **Codes** | | **Recording** | | | **Scale** |
| decision_medical | Who usually decides on women’s health care? | | Respondent alone=1; husband/partner alone=2 Respondent and husband/partner jointly=3; Someone else=4 | | Respondent alone =1; Jointly= 0; Partner or other alone­= -1 | | | Nominale |
| decision_major | Who usually makes decisions about making large household purchases? | | Respondent alone=1; husband/partner alone=2 Respondent and husband/partner jointly=3; Someone else=4 | | Respondent alone =1; Jointly= 0; Partner or other alone­= -1 | | | Nominale |
| decision_daily | Who usually makes decisions about making household purchases for daily needs? | | Respondent alone=1; husband/partner alone=2 Respondent and husband/partner jointly=3; Someone else=4 | | Respondent alone =1; Jointly= 0; Partner or other alone­= -1 | | | Nominale |
| decision_clothes | Who usually makes decisions about buying women’s clothes? | | Respondent alone=1; husband/partner alone=2 Respondent and husband/partner jointly=3; Someone else=4 | | Respondent alone =1; Jointly= 0; Partner or other alone­= -1 | | | Nominale |
| Decide_spending_partner | Who usually makes decisions about how husband’s earnings will be used? | | Respondent alone=1; husband/partner alone=2 Respondent and husband/partner jointly=3; Someone else=4 | | Respondent alone =1; Jointly= 0; Partner or other alone­= -1 | | | Nominale |
| **Partner/husband influence** | | | | | | | | |
| **item** | **Questions** | | **Codes** | | **Recording** | | **Scale** | |
| partner_fp_sad_12m | Has your husband/partner made you feel bad or treated you badly for wanting to use a FP method to delay or prevent pregnancy? | | No=0 ; Yes=1 | | No=1 ;  Don’t Know=0 ; Yes=-1 | | Nominale | |
| partner_force_sex_12m | Has your husband/partner Tried to force or pressure you to become pregnant? | | No=0 ; Yes=1 | | No=1 ; Don’t Know=0 ; Yes=-1 | | Nominale | |
| partner_abandon_12m | Has your husband/partner Said he would leave you if you did not get pregnant? | | No=0 ; Yes=1 | | No=1 ; Don’t Know=0 ; Yes=-1 | | Nominale | |
| partner_cheat_12m | Has your husband/partner Told you he would have a baby with someone else if you did not get pregnant? | | No=0 ; Yes=1 | | No=1 ; Don’t Know=0 ; Yes=-1 | | Nominale | |
| partner_fp_take_12m | Taken away your family planning or kept you from going to the clinic to get family planning? | | No=0 ; Yes=1 | | No=1 ; Don’t Know=0 ; Yes=-1 | | Nominale | |
| last_sex_not_want | At the last time you had sex, did you want to have it at that time? | | No=0 ; Yes=1 | | No=1 ; Don’t Know=0 ; Yes=-1 | | Nominale | |
| last_sex_pressured | At the last time you had sex, were you felt pressured by your husband / partner to have sex then? | | No=0 ; Yes=1 | | No=1 ; Don’t Know=0 ; Yes=-1 | | Nominale | |
| last_sex_not_consent | At the last time you had sex, do you consent (was forced) to have sex then? | | No=0 ; Yes=1 | | No=1 ; Don’t Know=0 ; Yes=-1 | | Nominale | |
| last_sex_duress | At the last time you had sex, have you felt at risk of physical violence if you declined to have sex at that time? | | No=0 ; Yes=1 | | No=1 ; Don’t Know=0 ; Yes=-1 | | Nominale | |
| **Contraception utilization** | | | | | | | | |
| **item** | | **Questions** | | **Codes** | **Recoding** | **Scale** | | |
| Seek_partner | | If I use family planning, my husband/partner may seek another sexual partner | | Strongly disagree =1; Disagree= 2; Neither agree nor disagree= 3; Agree=4; Strongly agree= 5; Do not know=-88; No response=-99 | Strongly disagree or disagree=1; Neither agree or don’t know=0; Agree or strongly agree=-1 | Nominale | | |
| trouble_preg | | If I use family planning, I may have trouble getting pregnant the next time I want to | | Strongly disagree =1; Disagree= 2; Neither agree nor disagree= 3; Agree=4; Strongly agree= 5; Do not know=-88; No response=-99 | Strongly disagree or disagree=1; Neither agree or don’t know=0; Agree or strongly agree=-1 | Nominale | | |
| will_conflict | | There will be conflict in my relationship/marriage if I use family planning | | Strongly disagree =1; Disagree= 2; Neither agree nor disagree= 3; Agree=4; Strongly agree= 5; Do not know=-88; No response=-99 | Strongly disagree or disagree=1; Neither agree or don’t know=0; Agree or strongly agree=-1 | Nominale | | |
| abnormal_birth | | If I use family planning, my children may not be born normal | | Strongly disagree =1; Disagree= 2; Neither agree nor disagree= 3; Agree=4; Strongly agree= 5; Do not know=-88; No response=-99 | Strongly disagree or disagree=1; Neither agree or don’t know=0; Agree or strongly agree=-1 | Nominale | | |
| body_side_effects | | If I use family planning, my body may experience side effects that will disrupt my relations with my husband/partner | | Strongly disagree =1; Disagree= 2; Neither agree nor disagree= 3; Agree=4; Strongly agree= 5; Do not know=-88; No response=-99 | Strongly disagree or disagree=1; Neither agree or don’t know=0; Agree or strongly agree=-1 | Nominale | | |
| switch_fp | | I can decide to switch from one family planning method to another if I want to | | Strongly disagree =1; Disagree= 2; Neither agree nor disagree= 3; Agree=4; Strongly agree= 5; Do not know=-88; No response=-99 | Strongly disagree or disagree=1; Neither agree or don’t know=0; Agree or strongly agree=-1 | Nominale | | |
